# Supplementary material
Source: ML conference proceedings conference paper supplement (https://proceedings.neurips.cc/paper_files/paper/2018/hash/584b98aac2dddf59ee2cf19ca4ccb75e-Abstract.html)
Supplement: Supplementary file 2 [file 584b98aac2dddf59ee2cf19ca4ccb75e-Supplemental.zip]

Archive with 1 entries (1 files):
- Meta-Learning_MCMC_Proposals_Supplementary_Materials.pdf
